# Supplementary material for: Identification and validation of key genes associated with pathogenesis and prognosis of gastric cancer
Source: PeerJ. 2023 Oct 16;11:e16243. doi: 10.7717/peerj.16243 (PMC10586292; doi:10.7717/peerj.16243)
Supplement: Supplemental Information 2 [file peerj-11-16243-s002.xlsx]

## Sheet: Sheet1
	RNA sequencing					Immunohistochemistry staining
	Sample	Sex	Age			Sample	Sex	Age
	NAG1	Female	29			NAG1	Female	43
	NAG2	Male	36			NAG2	Female	78
	NAG3	Male	50			NAG3	Male	31
	NAG4	Female	31			NAG4	Female	45
	NAG5	Female	32			NAG5	Male	53
	NAG6	Female	43			NAG6	Female	56
	NAG7	Female	56			NAG7	Female	60
	NAG8	Female	60			NAG8	Male	54
	NAG9	Female	53			NAG9	Male	54
	NAG10	Male	41			NAG10	Male	41
	IM1	Male	47			NAG11	Female	56
	IM2	Female	51			NAG12	Female	28
	IM3	Female	58			NAG13	Female	55
	IM4	Female	68			NAG14	Female	32
	IM5	Male	56			NAG15	Male	46
	IM6	Male	64			NAG16	Female	54
	IM7	Male	48			NAG17	Male	35
	IM8	Male	41			CAG1	Male	55
	IM9	Female	54			CAG2	Female	62
	IM10	Male	50			CAG3	Female	59
	GC1	Male	81			CAG4	Male	63
	GC2	Male	62			CAG5	Female	39
	GC3	Male	66			CAG6	Male	40
	GC4	Female	60			CAG7	Female	48
	GC5	Female	50			CAG8	Female	71
	GC6	Male	60			CAG9	Male	55
	GC7	Female	73			CAG10	Female	63
	GC8	Male	39			CAG11	Male	34
	GC9	Male	59			CAG12	Male	63
	GC10	Male	65			CAG13	Female	39
						CAG14	Female	43
						CAG15	Female	50
						IM1	Male	56
						IM2	Female	60
						IM3	Female	65
						IM4	Male	65
						IM5	Male	52
						IM6	Male	57
						IM7	Female	58
						IM8	Male	41
						IM9	Male	48
						IM10	Male	36
						IM11	Male	44
						IM12	Male	56
						IM13	Male	53
						EGC1	Female	61
						EGC2	Male	76
						EGC3	Male	68
						EGC4	Female	45
						EGC5	Male	46
						EGC6	Male	63
						EGC7	Male	57
						EGC8	Male	55
						EGC9	Male	60
						EGC10	Male	64
						EGC11	Male	57
						EGC12	Male	54
						EGC13	Female	53
						EGC14	Female	73
						EGC15	Female	56
						EGC16	Female	61
						GC1	Male	50
						GC2	Male	79
						GC3	Female	56
						GC4	Male	46
						GC5	Female	73
						GC6	Male	57
						GC7	Male	63
						GC8	Female	54
						GC9	Female	74
						GC10	Male	64
						GC11	Female	55
						GC12	Female	56
						GC13	Male	57
